# Supplementary material for: Charge transfer in the weak driving force limit in blends of MDMO-PPV and dithienylthiazolo[5,4-d]thiazoles towards organic photovoltaics with high VOC
Source: Royal Society of Chemistry journal article supplement (doi:10.1039/c2cp42399e), 2012-01-01
Supplement: c2cp42399e.pdf [file c2cp42399e.pdf]

***Electronic Supplementary Information with the article:***

**Charge transfer in the weak driving force limit in blends of MDMO-PPV and dithienylthiazolo[5,4-*d*]thiazoles towards organic photovoltaics with high  $V_{OC}$**

Nissy Nevil,<sup>\*a</sup> Yun Ling,<sup>a</sup> Sarah Van Mierloo,<sup>b</sup> Jurgen Kesters,<sup>b</sup> Fortunato Piersimoni,<sup>c</sup> Peter Adriaensens,<sup>b</sup> Laurence Lutsen,<sup>d</sup> Dirk Vanderzande,<sup>b,d</sup> Jean Manca,<sup>c</sup> Wouter Maes,<sup>b</sup> Sabine Van Doorslaer<sup>a</sup> and Etienne Goovaerts<sup>\*a</sup>

<sup>a</sup> University of Antwerp, Physics Department, Universiteitsplein 1, B-2610 Antwerpen, Belgium;  
E-mail: Etienne.Goovaerts@ua.ac.be

<sup>b</sup> Hasselt University, Institute for Materials Research (IMO-IMOMEC), Design & Synthesis of Organic Semiconductors (DSOS), Agoralaan 1 - Building D, B-3590 Diepenbeek, Belgium;  
E-mail: Wouter.Maes@uhasselt.be

<sup>c</sup> Hasselt University, Institute for Materials Research (IMO-IMOMEC), Organic + Nanostructured Electronics and Energy Conversion (ONE<sup>2</sup>), Universitaire Campus - Wetenschapspark 1, B-3590 Diepenbeek, Belgium; E-mail: Jean.Manca@uhasselt.be

<sup>d</sup>IMEC, IMOMEC Ass. Lab., Universitaire Campus - Wetenschapspark 1, B-3590 Diepenbeek, Belgium

**Table S1** Profilometer thickness measurements of the spin-cast films.

|                                            | thickness<br>(nm) | error<br>(nm) |
|--------------------------------------------|-------------------|---------------|
| MDMO-PPV                                   | 256               | 35            |
| 4-CN-Ph-DTTzTz                             | 84                | 9             |
| 4-CN-Ph-DTTzTz:MDMO-PPV 1:1                | 228               | 28            |
| 4-CF <sub>3</sub> -Ph-DTTzTz               | 60                | 11            |
| 4-CF <sub>3</sub> -Ph-DTTzTz:MDMO- PPV 1:1 | 169               | 29            |
| Th-DTTzTz                                  | 53 *              | 12            |
| Th-DTTzTz:MDMO- PPV 1:1                    | 173               | 20            |

\* at the lower limit of the detection range of the instrument.

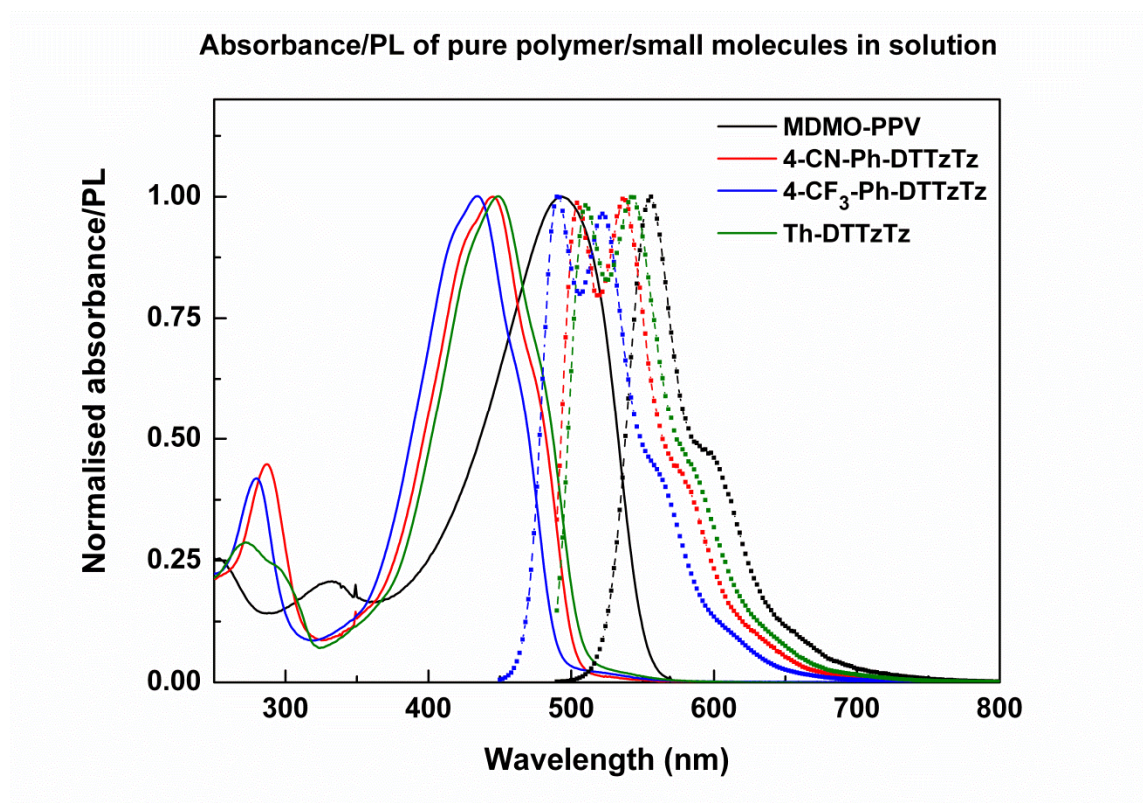

**Fig S1** Normalized UV-vis absorption (solid curves) and PL spectra (symbols) of **MDMO-PPV** (black), **4-CN-Ph-DTTzTz** (red), **4-CF<sub>3</sub>-Ph-DTTzTz** (blue) and **Th-DTTzTz** (green) in CHCl<sub>3</sub> solutions (10<sup>-5</sup> M). PL measured for  $\lambda_{\text{exc}} = 474$  nm, except for **4-CF<sub>3</sub>-Ph-DTTzTz** for which  $\lambda_{\text{exc}} = 430$  nm.

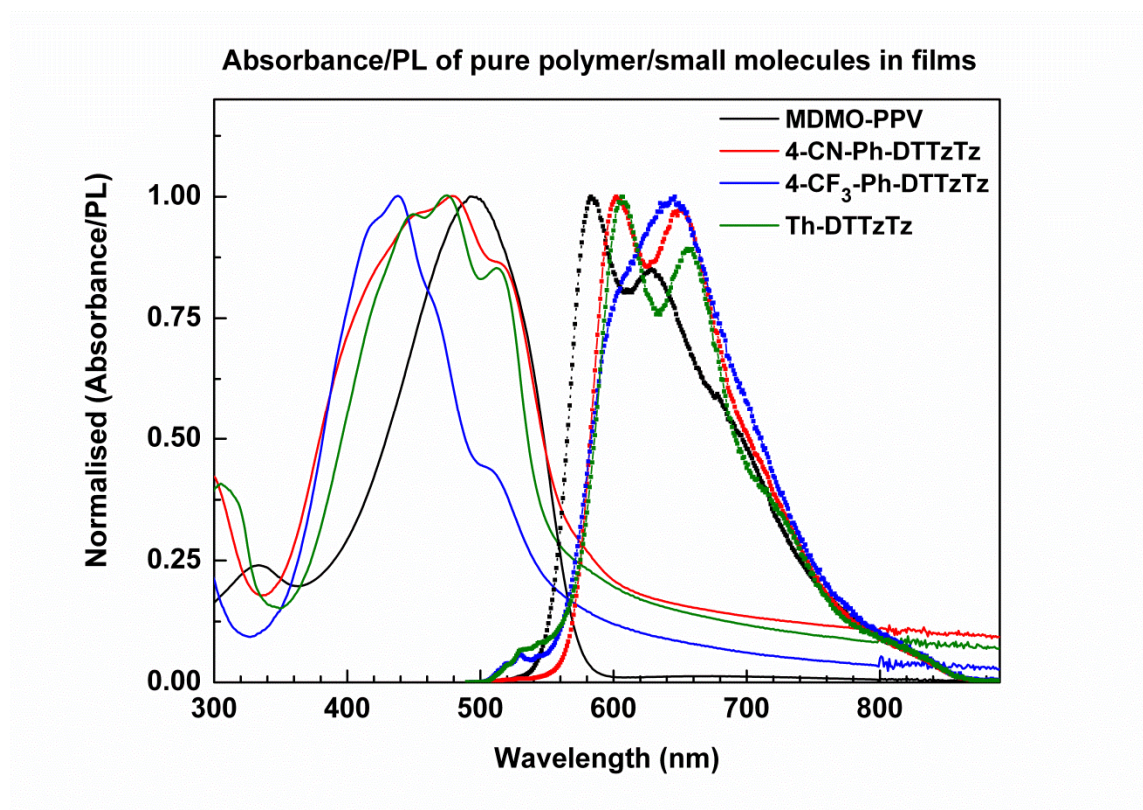

**Fig. S2** Normalized UV-vis absorption (solid curves) and PL spectra (symbols,  $\lambda_{\text{exc}} = 474$  nm) of spin-coated films of the pure compounds **MDMO-PPV** (black), **4-CN-Ph-DTTzTz** (red), **4-CF<sub>3</sub>-Ph-DTTzTz** (blue) and **Th-DTTzTz** (green).

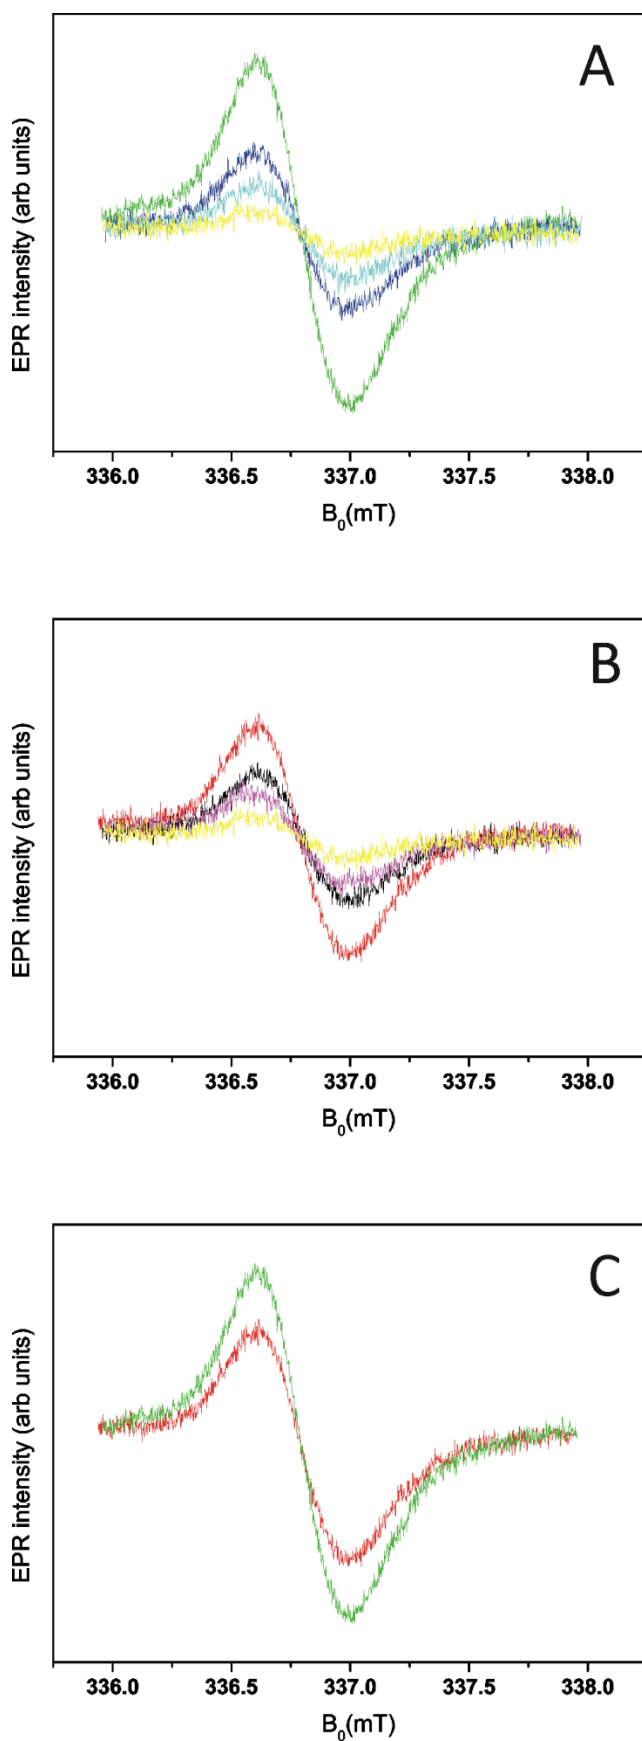

**Fig. S3** (A) X-band CW LI-EPR spectra of films of pristine **MDMO-PPV** (yellow) and 1:1 blends of **MDMO-PPV:Th-DDTzTz** (cyan), **MDMO-PPV:4- $CF_3$ -Ph-DDTzTz** (dark blue) and **MDMO-PPV:4-CN-Ph-DDTzTz** (green); (B) X-band CW LI-EPR spectra of films of pristine **MDMO-PPV** (yellow) and 4:1 blends of **MDMO-PPV:Th-DDTzTz** (purple), **MDMO-PPV:4- $CF_3$ -Ph-DDTzTz** (black) and **MDMO-PPV:4-CN-Ph-DDTzTz** (red); (C) Relative comparison of the X-band LI-EPR spectra of a 1:1 (green) and 4:1 blend (red) **MDMO-PPV:4-CN-Ph-DDTzTz**.

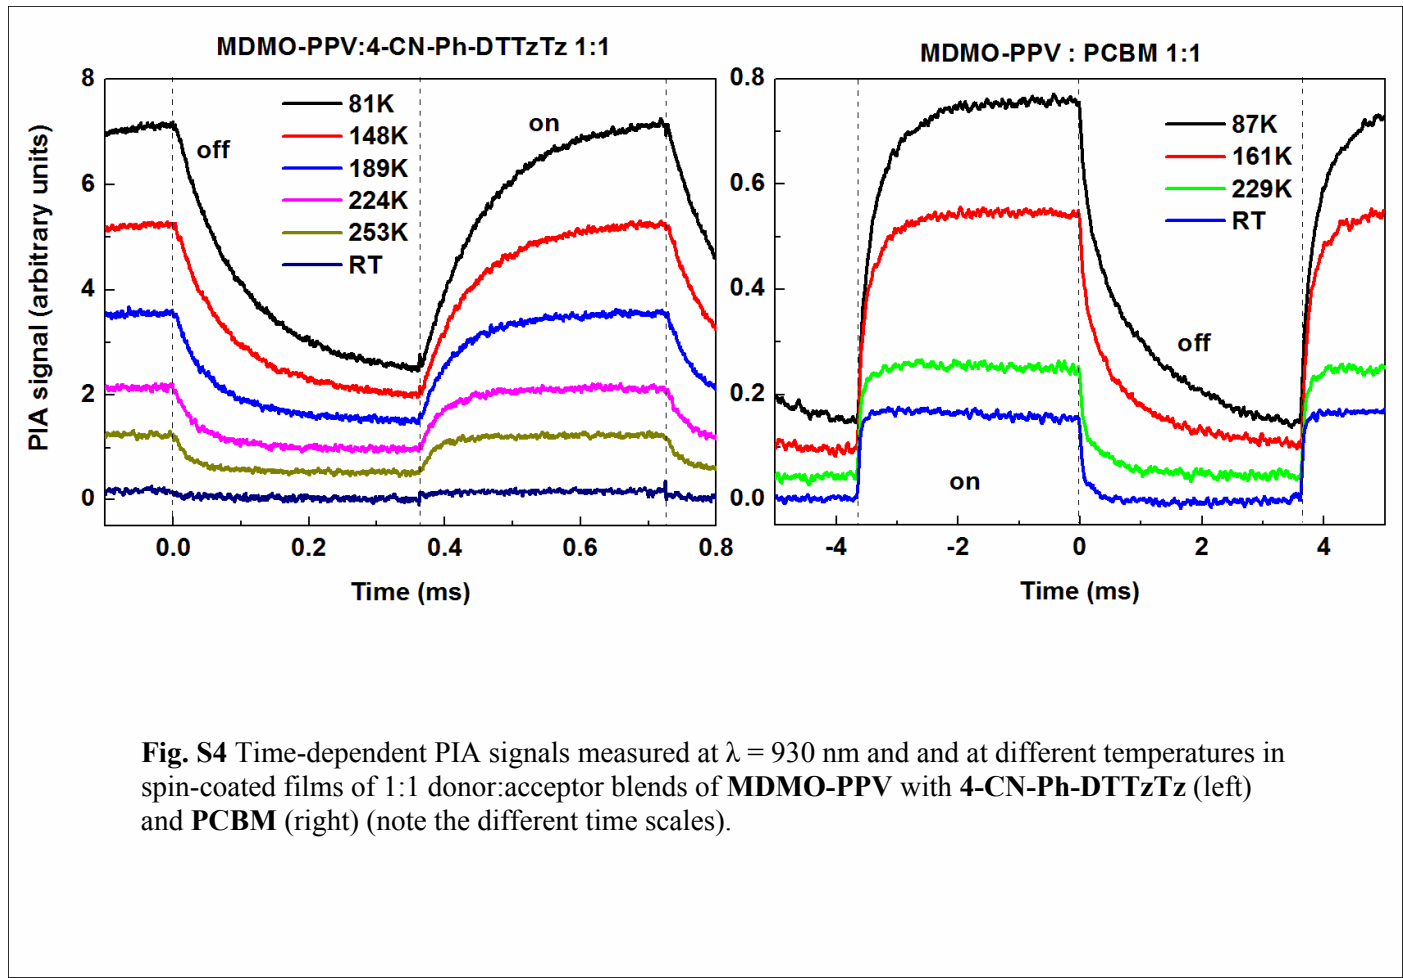

**Fig. S4** Time-dependent PIA signals measured at  $\lambda = 930$  nm and at different temperatures in spin-coated films of 1:1 donor:acceptor blends of **MDMO-PPV** with **4-CN-Ph-DDTzTz** (left) and **PCBM** (right) (note the different time scales).
